# Supplementary material for: Four-Dimensional Printed Construct from Temperature-Responsive Self-Folding Feedstock for Pharmaceutical Applications with Machine Learning Modeling
Source: MDPI journal article supplement (doi:10.3390/pharmaceutics15041266), 2023-04-18
Supplement: s1 [file s1]

## Supplementary Figures

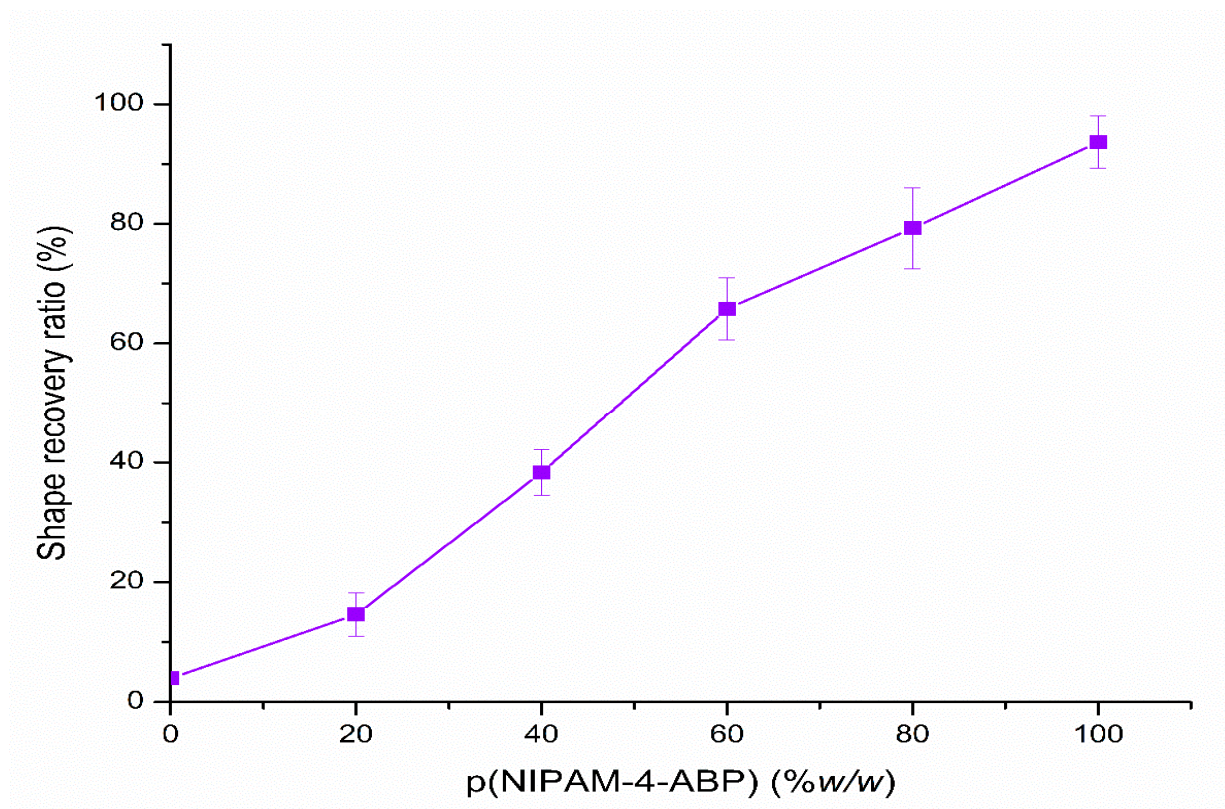

**Supplementary Figure S1.** Relation between shape recovery ratio (%) versus % w/w of p(NIPAM-4-ABP). The experiment was performed in n=6.

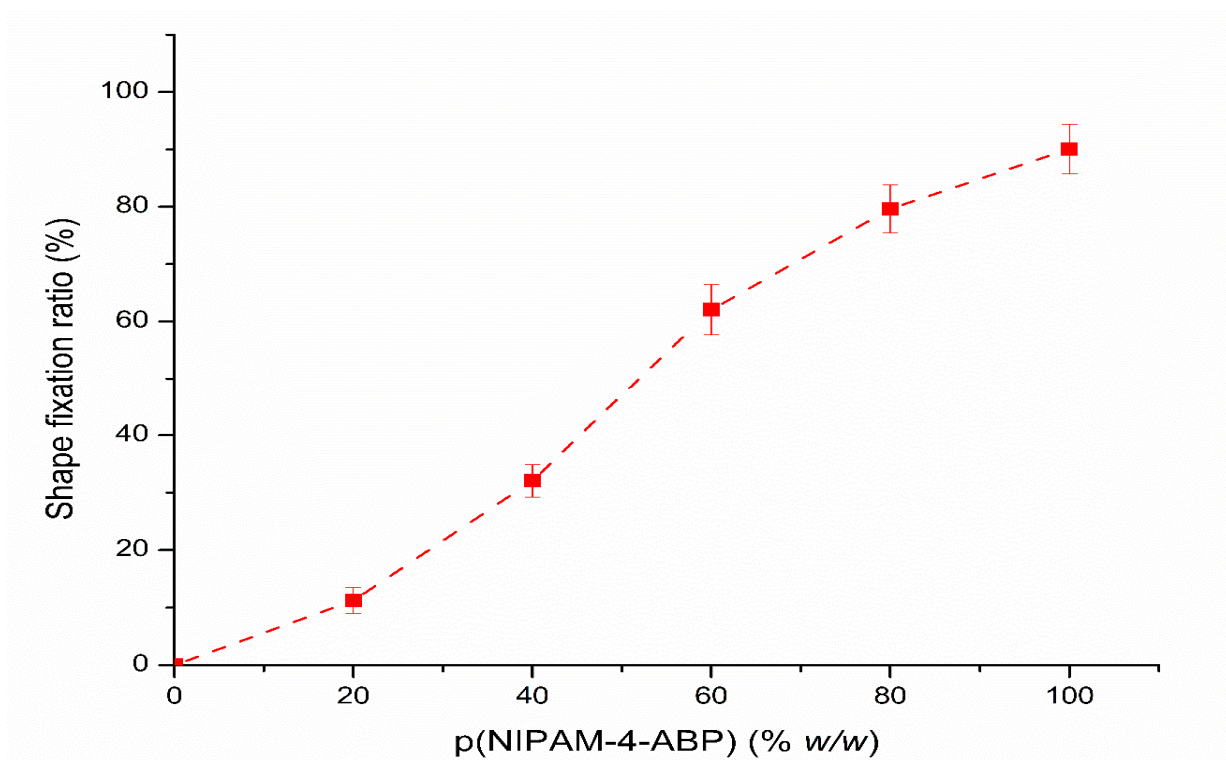

**Supplementary Figure S2:** Relation between shape fixation ratio (%) versus % w/w of p(NIPAM-4-ABP). The experiment was performed in n=6.

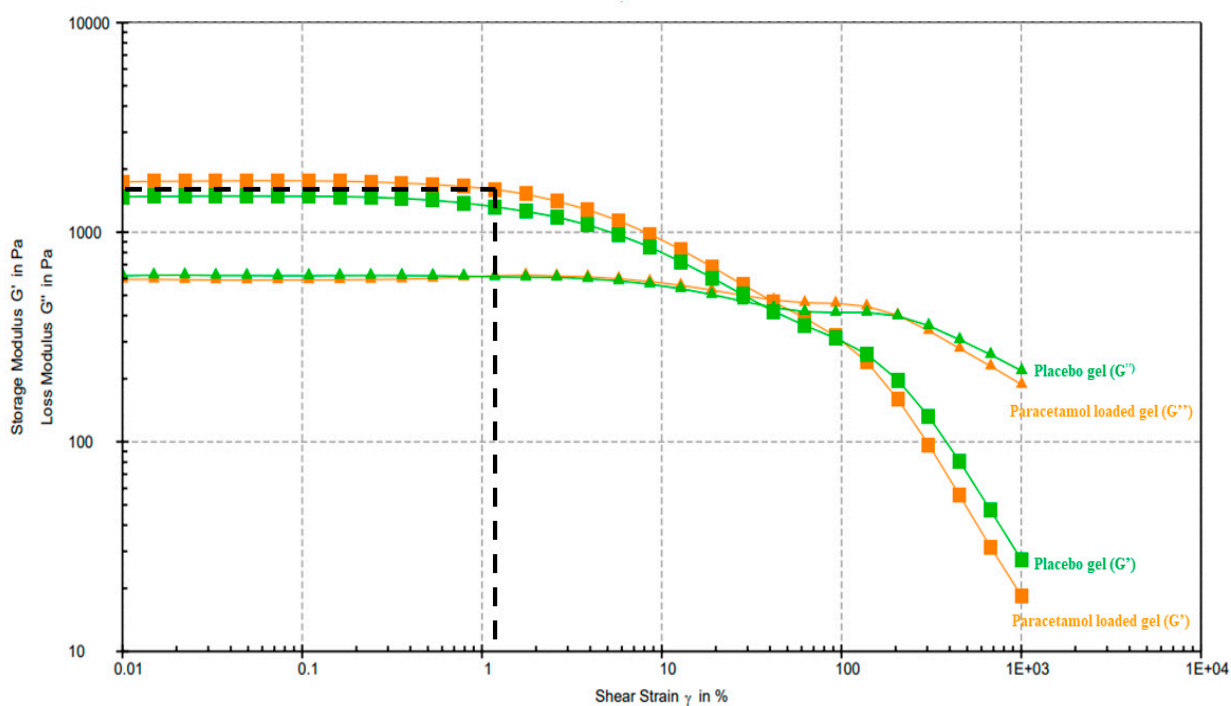

**Supplementary Figure S3:** Amplitude sweep test as a function of storage modulus ( $G'$ ) and Loss modulus ( $G''$ ).  $G' > G''$  sample has solid viscoelastic behaviour.

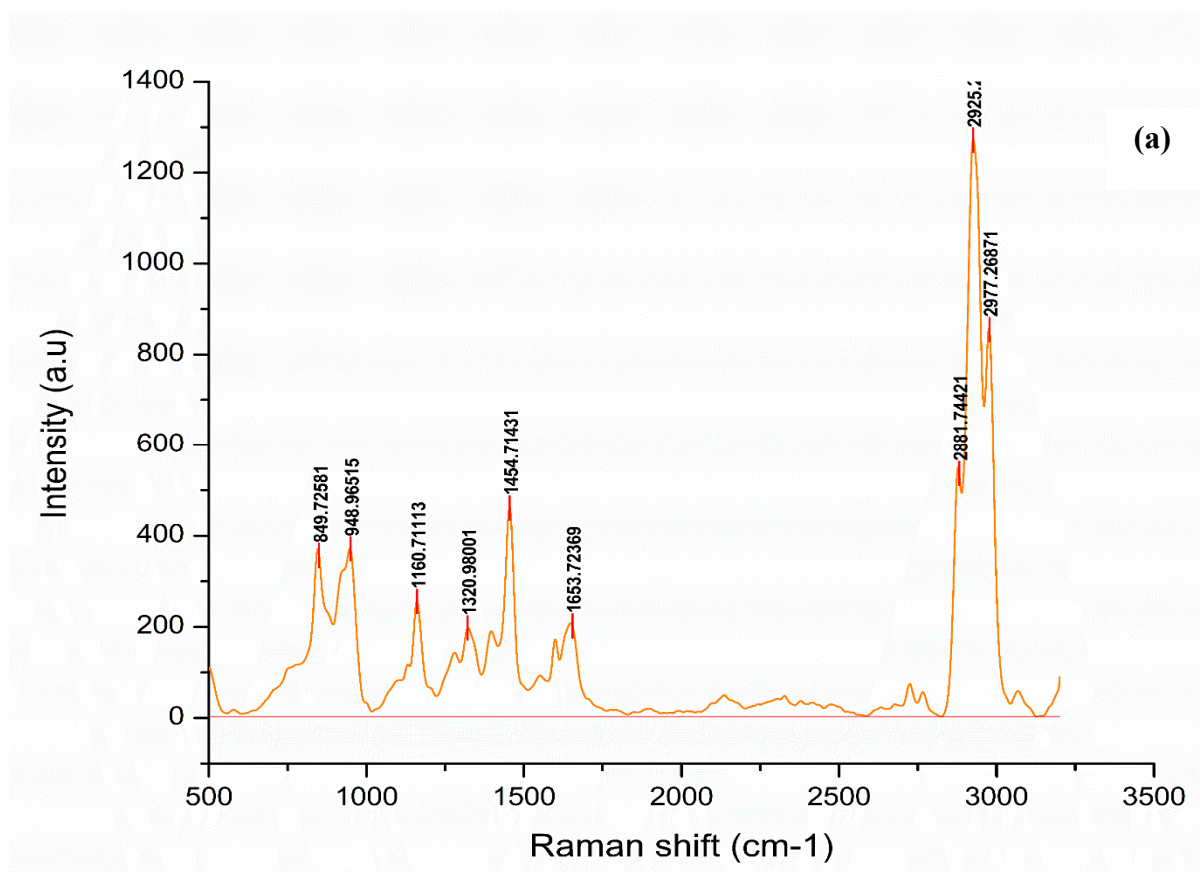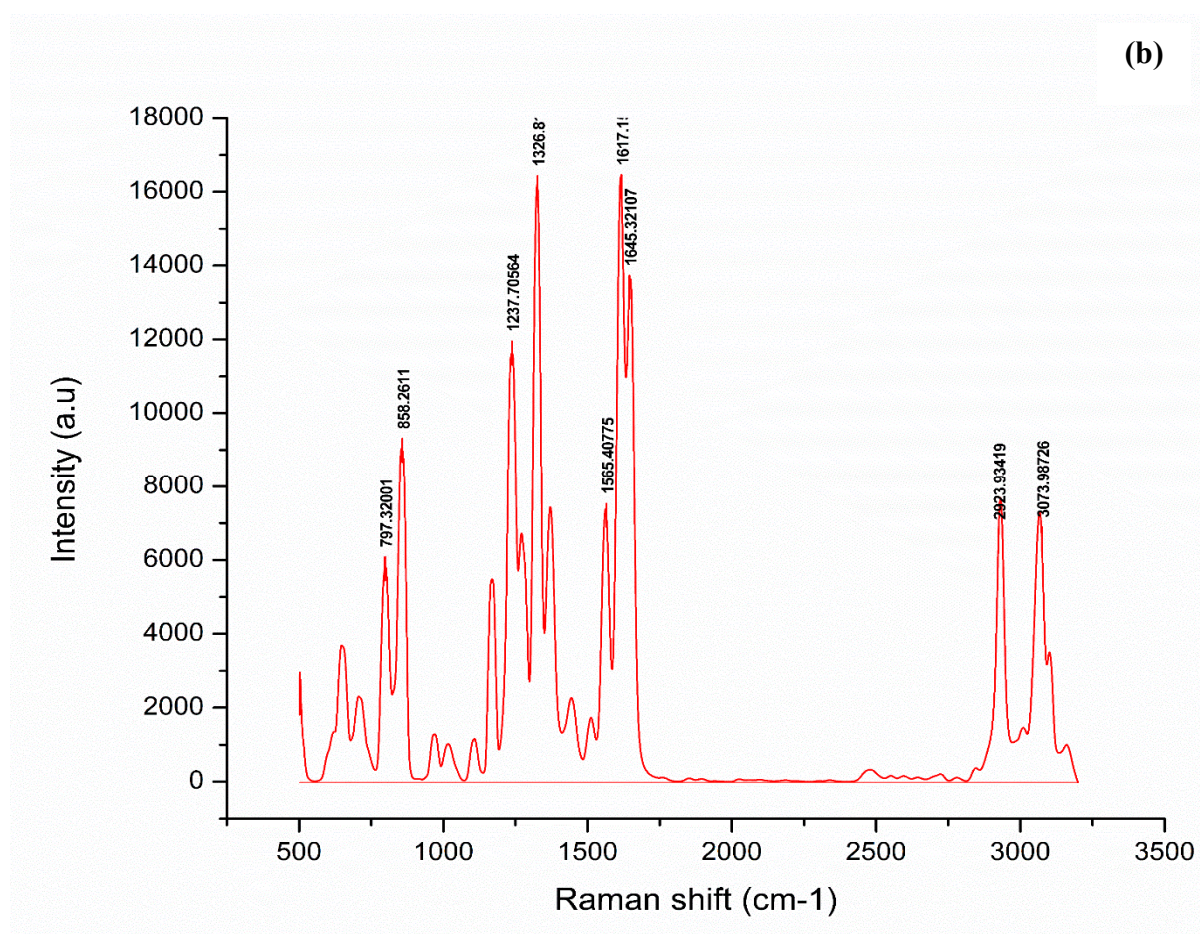

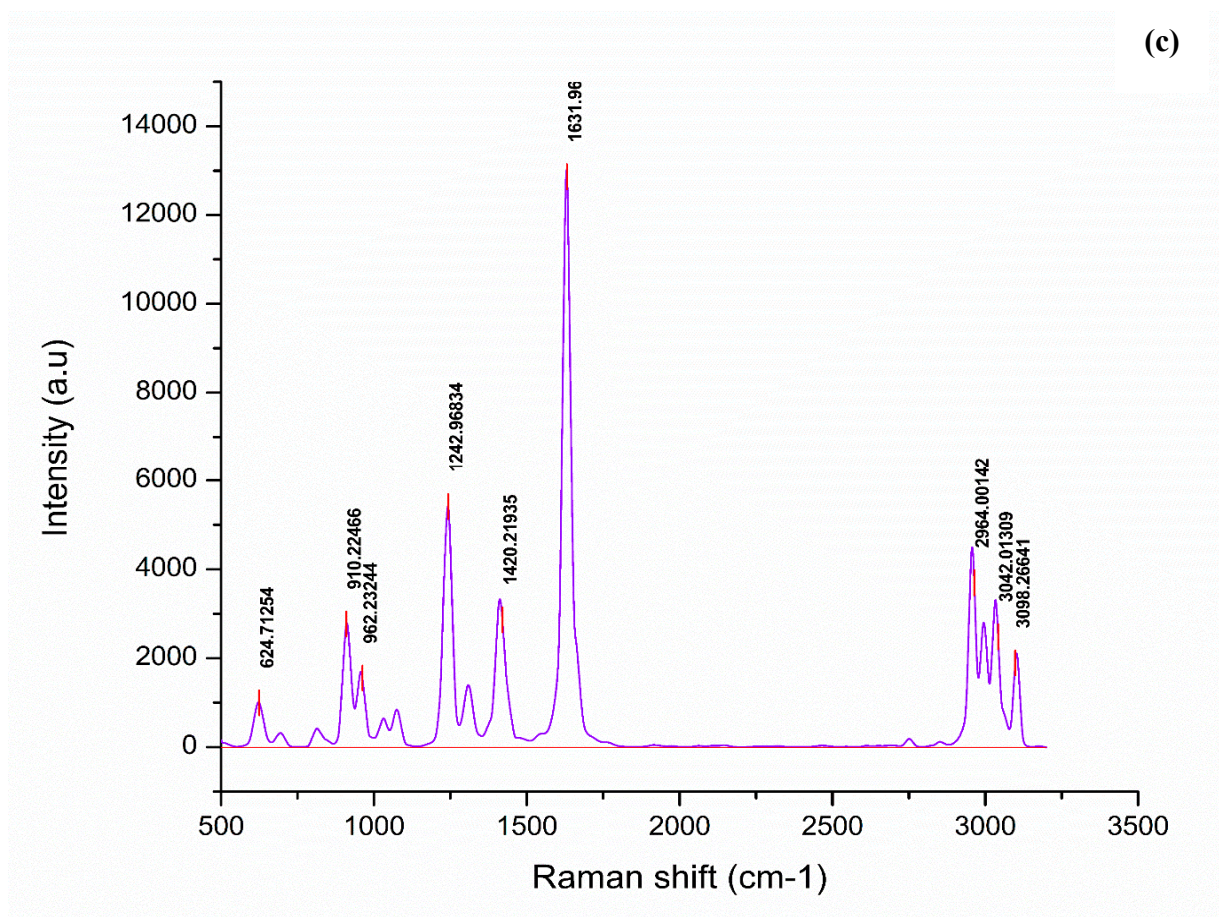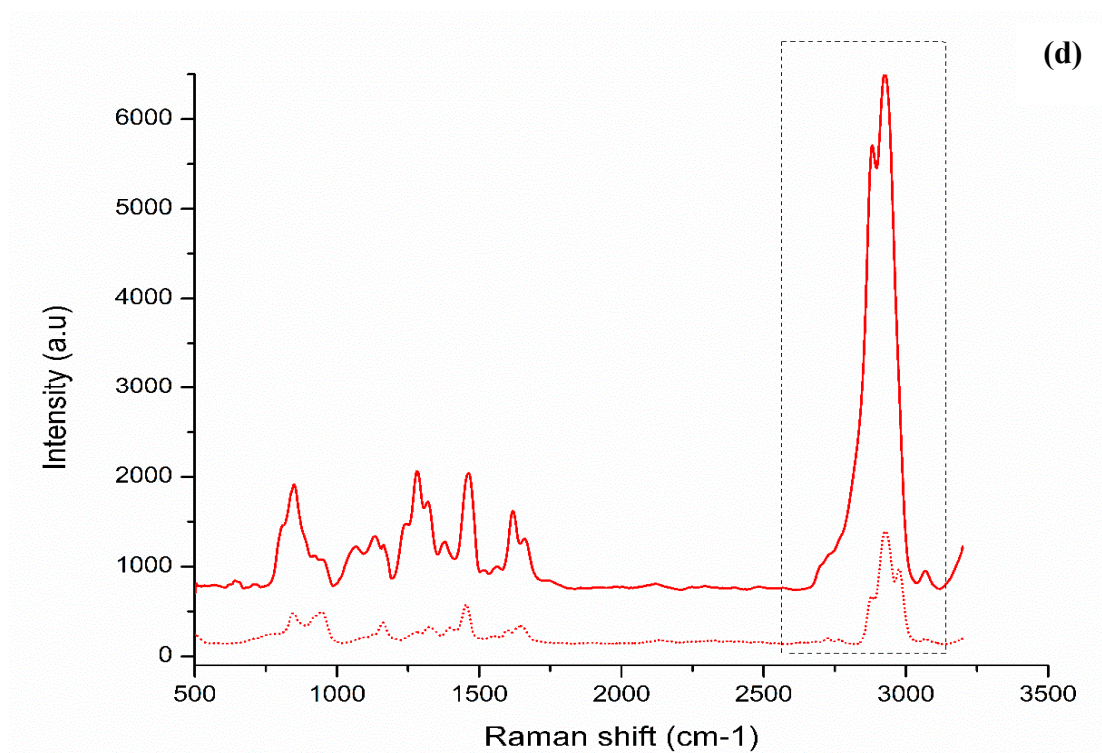

**Supplementary Figure S4:** Raman spectra of (a) p(NIPAM-4ABP), (b) PCM, (c) BIS, (d) optimized p(NIPAM-4ABP) placebo (.....) and PCM-loaded 3D construct (—).
